# Supplementary material for: Efficacy of Liming Forest Soil in the Context of African Swine Fever Virus
Source: MDPI journal article supplement (doi:10.3390/v14040734), 2022-03-31
Supplement: s1 [file s1]

**Supplementary Table S1** – qPCR – lime experiments (as explained in section 2.2) - **MVA** – Of (top soil) of soil samples 277, 295, 30, 171, 141, 89

|                    | <b>277 - Of</b> |          | <b>295 - Of</b> |          | <b>30 - Of</b> |          | <b>171 - Of</b> |          | <b>141 - Of</b> |          | <b>89 - Of</b> |          |
|--------------------|-----------------|----------|-----------------|----------|----------------|----------|-----------------|----------|-----------------|----------|----------------|----------|
|                    | cT              | copies   | cT              | copies   | cT             | copies   | cT              | copies   | cT              | copies   | cT             | copies   |
| <b>Slaked lime</b> | 28,475          | 4,01E+03 | 29,57           | 1,99E+03 | 31,265         | 1,12E+03 | 26,4            | 9,58E+03 | 29,005          | 6,60E+03 | 29,5           | 1,58E+03 |
| <b>Lime milk</b>   | 30,835          | 1,34E+03 | 31,425          | 3,83E+03 | 31,25          | 1,72E+03 | 31,035          | 2,28E+03 | 31,625          | 1,09E+03 | 33,775         | 9,50E+02 |
| <b>Quicklime</b>   | 30,22           | 4,93E+02 | 29,46           | 1,01E+03 | 31,755         | 1,92E+02 | 29,705          | 1,34E+03 | 31,75           | 3,40E+02 | 31,585         | 2,37E+02 |

|                               | <b>277 - Of – Contr.</b> |          | <b>295 - Of – Contr.</b> |          | <b>30 - Of – Contr.</b> |          | <b>171 - Of – Contr.</b> |          | <b>141 - Of – Contr.</b> |          | <b>89 - Of – Contr.</b> |          | <b>MVA + PBS</b> |          |
|-------------------------------|--------------------------|----------|--------------------------|----------|-------------------------|----------|--------------------------|----------|--------------------------|----------|-------------------------|----------|------------------|----------|
|                               | cT                       | copies   | cT                       | copies   | cT                      | copies   | cT                       | copies   | cT                       | copies   | cT                      | copies   | cT               | copies   |
| <b>Slaked lime – experim.</b> | 23,9                     | 3,54E+04 | 23,05                    | 5,95E+04 | 23,4                    | 5,17E+04 | 25,99                    | 1,18E+04 | 24,44                    | 2,55E+04 | 24,54                   | 2,41E+04 | 23,275           | 5,78E+04 |
| <b>Lime milk – experim.</b>   | 28,58                    | 5,01E+03 | 24,75                    | 4,15E+04 | 26,07                   | 2,59E+04 | 24,01                    | 6,05E+04 | 27,83                    | 9,00E+03 | 23,64                   | 7,28E+04 | 21,7             | 2,42E+05 |
| <b>Quicklime – experim.</b>   | 23,29                    | 4,42E+04 | 22,79                    | 6,12E+04 | 22,32                   | 8,94E+04 | 24,3                     | 2,53E+04 | 24,47                    | 2,32E+04 | 24,46                   | 2,23E+04 | 23,125           | 5,45E+04 |

**Supplementary Table S2** – qPCR – lime experiments (as explained in section 2.2) - **MVA** – A (mineral soil) of soil samples 277, 295, 30, 171, 141, 89

|                    | <b>277 - A</b> |          | <b>295 - A</b> |          | <b>30 - A</b> |          | <b>171 - A</b> |          | <b>141 - A</b> |          | <b>89 - A</b> |          |
|--------------------|----------------|----------|----------------|----------|---------------|----------|----------------|----------|----------------|----------|---------------|----------|
|                    | cT             | copies   | cT             | copies   | cT            | copies   | cT             | copies   | cT             | copies   | cT            | copies   |
| <b>Slaked lime</b> | 31,585         | 3,31E+02 | 29,555         | 1,27E+03 | 29,515        | 1,17E+03 | 29,31          | 1,33E+03 | 29,01          | 1,70E+03 | 30,93         | 8,91E+02 |
| <b>Lime milk</b>   | 31,755         | 1,16E+03 | 32,73          | 9,96E+02 | 32,095        | 1,79E+03 | 33,335         | 5,05E+02 | 33,205         | 5,26E+02 | 31,11         | 1,63E+03 |
| <b>Quicklime</b>   | 30,55          | 3,97E+02 | 30,62          | 5,60E+02 | 30,085        | 6,46E+02 | 31,865         | 2,60E+02 | 31,32          | 5,35E+02 | 30,48         | 4,27E+02 |

|                               | <b>277 - A – Contr.</b> |          | <b>295 - A – Contr.</b> |          | <b>30 - A – Contr.</b> |          | <b>171 - A – Contr.</b> |          | <b>141 - A – Contr.</b> |          | <b>89 - A – Contr.</b> |          | <b>MVA + PBS</b> |          |
|-------------------------------|-------------------------|----------|-------------------------|----------|------------------------|----------|-------------------------|----------|-------------------------|----------|------------------------|----------|------------------|----------|
|                               | cT                      | copies   | cT                      | copies   | cT                     | copies   | cT                      | copies   | cT                      | copies   | cT                     | copies   | cT               | copies   |
| <b>Slaked lime – experim.</b> | 24,095                  | 4,65E+04 | 27,7                    | 4,46E+03 | 28,47                  | 9,33E+02 | 26,165                  | 5,14E+03 | 34,38                   | 3,42E+03 | 38,53                  | 3,31E+04 | 22,86            | 3,78E+04 |
| <b>Lime milk – experim.</b>   | 26,22                   | 2,34E+04 | 26,69                   | 9,58E+03 | 27,62                  | 1,35E+04 | 28,275                  | 8,05E+03 | 28,25                   | 1,02E+04 | 38,495                 | 1,47E+03 | 22,55            | 1,67E+05 |
| <b>Quicklime – experim.</b>   | 23,165                  | 4,87E+04 | 38,9                    | 1,60E+03 | 31,825                 | 2,23E+02 | 26,535                  | 6,02E+03 | 28,185                  | 4,87E+03 | 29,655                 | 2,55E+03 | 23,275           | 4,71E+04 |

**Supplementary Table S3** – qPCR – **ASFV** – lime experiments (as explained in section 2.2) - Of and A (top soil and mineral soil) of soil samples 277, 295, 30, 171, 141, 89

|                    | <b>277 - Of</b> |          | <b>295 - Of</b> |          | <b>30 - Of</b> |          | <b>171 - Of</b> |          | <b>141 - Of</b> |          | <b>89 - Of</b> |          | <b>ASFV + PBS</b> |          |
|--------------------|-----------------|----------|-----------------|----------|----------------|----------|-----------------|----------|-----------------|----------|----------------|----------|-------------------|----------|
|                    | cT              | copies   | cT              | copies   | cT             | copies   | cT              | copies   | cT              | copies   | cT             | copies   | cT                | copies   |
| <b>Slaked lime</b> | 25,42           | 1,44E+02 | 23,675          | 4,62E+02 | 24,705         | 2,41E+02 | 24,355          | 2,93E+02 | 23,845          | 4,24E+02 | 25,745         | 1,26E+02 | -                 | -        |
| <b>Lime milk</b>   | 24,3            | 3,14E+02 | 23,29           | 6,05E+02 | 23,125         | 6,75E+02 | 23,27           | 6,18E+02 | 24,12           | 3,94E+02 | 24,61          | 2,75E+02 | -                 | -        |
| <b>Quicklime</b>   | 25,865          | 1,05E+02 | 25,01           | 1,89E+02 | 25,91          | 1,04E+02 | 25,435          | 1,41E+02 | 24,665          | 1,66E+02 | 25,83          | 1,08E+02 | -                 | -        |
| <b>Control</b>     | 24,12           | 3,42E+02 | 23,12           | 6,92E+02 | 22,82          | 8,27E+02 | 24,11           | 3,45E+02 | 23,72           | 4,53E+02 | 23,06          | 7,05E+02 | 22,9              | 7,88E+02 |

|                    | <b>277 - A</b> |          | <b>295 - A</b> |          | <b>30 - A</b> |          | <b>171 - A</b> |          | <b>141 - A</b> |          | <b>89 - A</b> |          | <b>ASFV + PBS</b> |          |
|--------------------|----------------|----------|----------------|----------|---------------|----------|----------------|----------|----------------|----------|---------------|----------|-------------------|----------|
|                    | cT             | copies   | cT             | copies   | cT            | copies   | cT             | copies   | cT             | copies   | cT            | copies   | cT                | copies   |
| <b>Slaked lime</b> | 27,955         | 3,53E+01 | 27,74          | 3,42E+01 | 27,91         | 3,97E+01 | 30,195         | 6,50E+00 | 29,175         | 1,64E+01 | 29,605        | 1,13E+01 | -                 | -        |
| <b>Lime milk</b>   | 27,445         | 8,28E+01 | 26,6           | 9,50E+01 | 26,06         | 1,21E+02 | 30,065         | 9,30E+00 | 27,055         | 6,23E+01 | 27,61         | 4,67E+01 | -                 | -        |
| <b>Quicklime</b>   | 28,715         | 2,99E+01 | 27,435         | 4,09E+01 | 27,23         | 5,85E+01 | 30,145         | 1,02E+01 | 29,005         | 2,21E+01 | 29,4          | 1,68E+01 | -                 | -        |
| <b>Control</b>     | 23,62          | 5,18E+02 | 24,69          | 2,58E+02 | 24,01         | 4,02E+02 | 26,33          | 8,62E+01 | 25,16          | 1,88E+02 | 25,5          | 1,49E+02 | 23,08             | 8,32E+02 |

**Supplemenatry Table S4** – qPCR – lime/water-ratio (as explained in section 2.3) - **MVA** – Of and A (top soil and mineral soil) of soil sample 277

|                         | <b>0</b> |          | <b>1:2</b> |          | <b>1:3</b> |          | <b>1:5</b> |          | <b>1:9</b> |          | <b>MVA + PBS<br/>(control)</b> |          |
|-------------------------|----------|----------|------------|----------|------------|----------|------------|----------|------------|----------|--------------------------------|----------|
|                         | cT       | copies   | cT         | copies   | cT         | copies   | cT         | copies   | cT         | copies   | cT                             | copies   |
| <b>Slaked lime - Of</b> | 35,99    | 9,96E+00 | 34,79      | 3,14E+01 | 32,525     | 9,84E+01 | 30,495     | 4,09E+02 | 31,1       | 2,96E+02 | 25,855                         | 8,58E+03 |
| <b>Quicklime-Of</b>     | 35,64    | 3,05E+01 | 33,575     | 4,57E+01 | 30,31      | 6,89E+02 | 29,015     | 1,35E+03 | 31,97      | 2,41E+02 | 24,14                          | 5,01E+04 |

|                        | <b>0</b> |          | <b>1:2</b> |          | <b>1:3</b> |          | <b>1:5</b> |          | <b>1:9</b> |          | <b>MVA + PBS<br/>(control)</b> |          |
|------------------------|----------|----------|------------|----------|------------|----------|------------|----------|------------|----------|--------------------------------|----------|
|                        | cT       | copies   | cT         | copies   | cT         | copies   | cT         | copies   | cT         | copies   | cT                             | copies   |
| <b>Slaked lime - A</b> | 32,825   | 1,76E+02 | 33,22      | 1,38E+02 | 35,215     | 2,89E+01 | 33,665     | 4,75E+01 | 32,39      | 1,90E+02 | 26,47                          | 5,61E+03 |
| <b>Quicklime - A</b>   | 32,35    | 1,09E+02 | 33,3       | 1,68E+02 | 32,915     | 2,48E+02 | 30,62      | 4,65E+02 | 31,795     | 1,78E+02 | 25,935                         | 1,46E+04 |

**Supplementary Table S5**– Final concentrations and added amount of quick lime and slaked lime in experimental layout for lime experiments (see 2.2 in manuscript)

| Disinfectant                           | Virus (mL) | FCS (mL) | Amount of disinfectant added (g) | Concentration during experiment |
|----------------------------------------|------------|----------|----------------------------------|---------------------------------|
| Quick lime/<br>Slaked lime<br>(powder) | 3          | 4        | 0.07                             | 1%                              |
|                                        |            |          | 0.35                             | 5%                              |
|                                        |            |          | 0.7                              | 10%                             |

**Supplementary Table S6** – Stock dilution and final concentrations of lime milk in experimental layout for lime experiments (see 2.2 in manuscript); each stock was freshly prepared with WSH (water with standardized hardness level) directly before each experiment

| Disinfectant            | Virus (mL) | FCS (mL) | Stock concentration<br>(x3.4 of desired concentration) | Added volume of stock (mL) | Concentration during experiment |
|-------------------------|------------|----------|--------------------------------------------------------|----------------------------|---------------------------------|
| Lime milk<br>(solution) | 3          | 4        | 3,4%                                                   | 2.9                        | 1%                              |
|                         |            |          | 17%                                                    | 2.9                        | 5%                              |
|                         |            |          | 34%                                                    | 2.9                        | 10%                             |
